# Supplementary material for: Benzothiazole-decorated iridium-based nanophotosensitizers for photodynamic therapy of cancer cells
Source: Royal Society of Chemistry journal article supplement (doi:10.1039/d1dt04315c), 2022-01-01
Supplement: d1dt04315c1.pdf [file d1dt04315c1.pdf]

**Supplementary Information**

**Benzothiazole-decorated iridium-based nano-photosensitizers for photodynamic  
therapy of cancer cells**

Xiang Wang<sup>a</sup>, Kang Song<sup>a</sup>, Yong Deng<sup>a</sup>, Jie Liu<sup>a</sup>, Qin Peng<sup>a</sup>, Xiao Lao<sup>a</sup>, Jiayu Xu<sup>a</sup>, Dong Wang<sup>a</sup>,  
Turong Shi<sup>a</sup>, Yuhao Li<sup>a,c\*</sup>, Dan Deng<sup>b\*</sup>, Yuqing Miao<sup>a,c\*</sup>

*a School of Materials and Chemistry & Institute of Bismuth and Rhenium Science, University of  
Shanghai for Science and Technology, Shanghai 200093, China.*

*b. Dermatology Department, Xinhua Hospital, School of Medicine, Shanghai Jiaotong University,  
200092, China. Email: dengdan1234567@126.com (D. Deng)*

*c. Shanghai Collaborative Innovation Center of Energy Therapy for Tumors, University of Shanghai  
for Science and Technology, Shanghai 200093, China.*

\* Corresponding author.

yhli@usst.edu.cn (Y. Li)

dengdan1234567@126.com (D. Deng)

yqmiao@usst.edu.cn (Y. Miao)

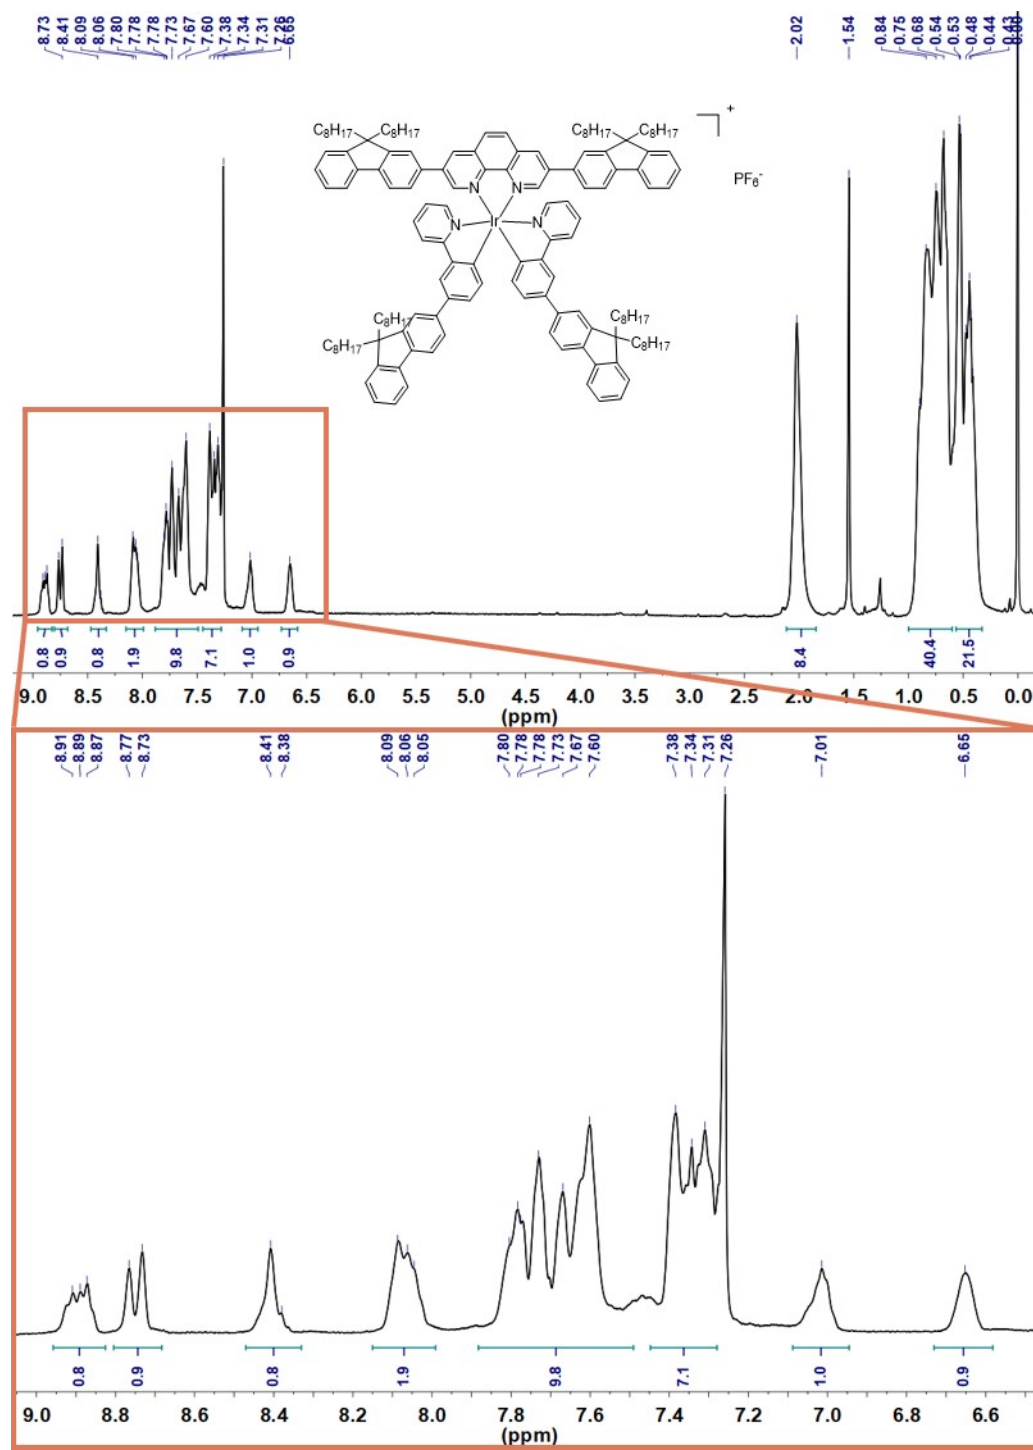

Fig. S1. <sup>1</sup>H NMR of 1.

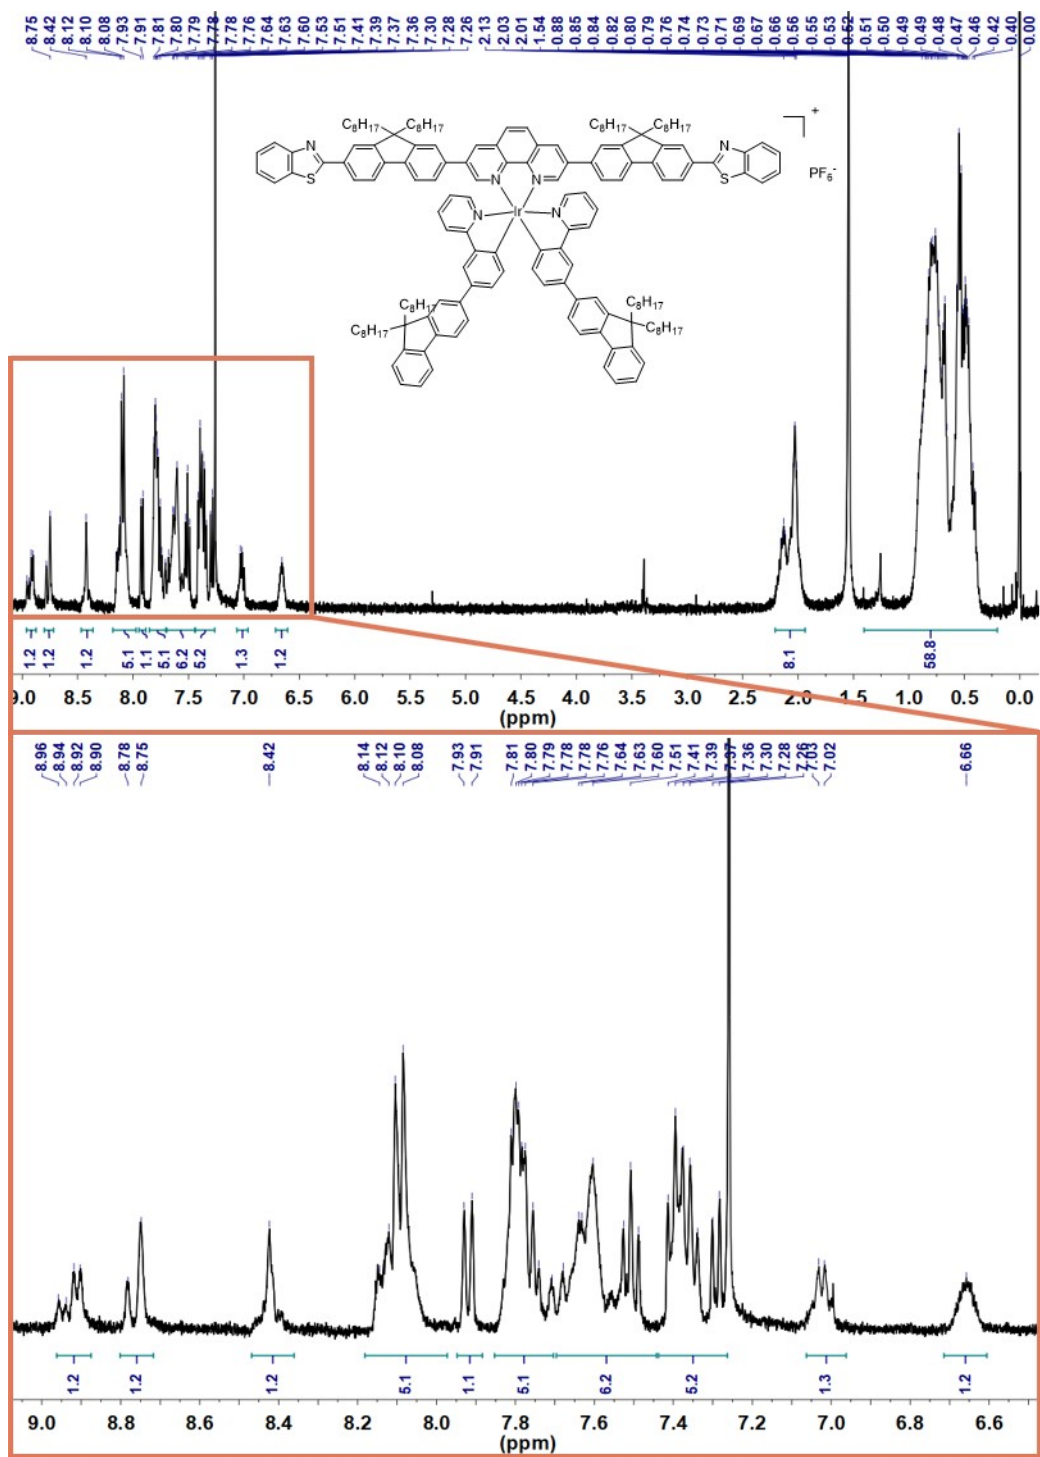

Fig. S2.  $^1\text{H}$  NMR of 2.

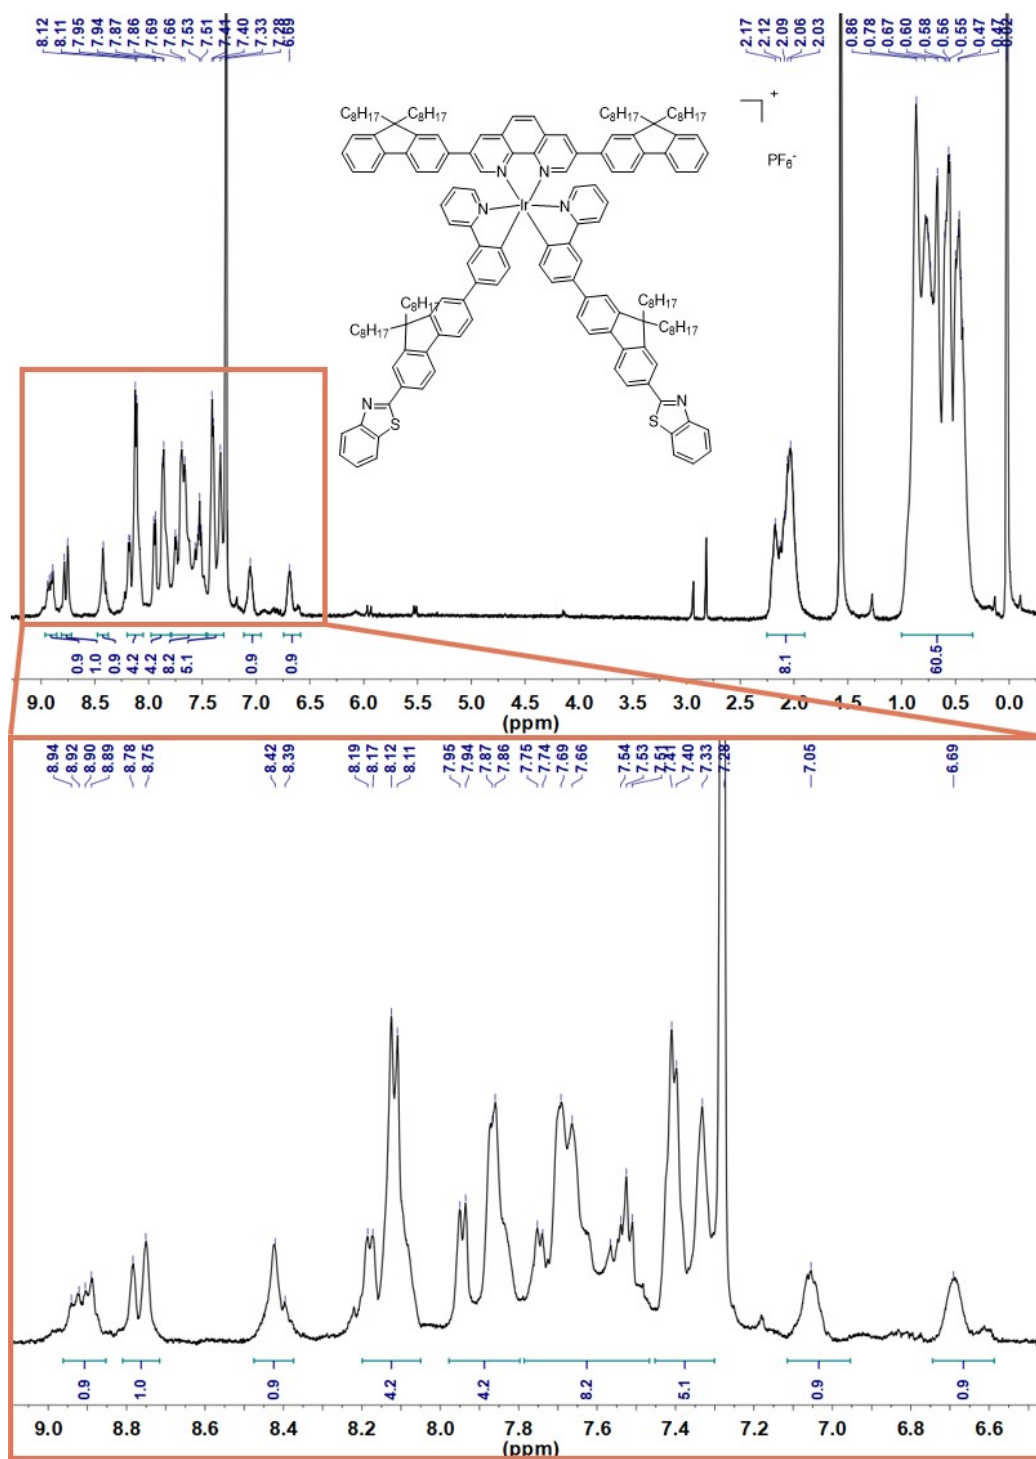

Fig. S3.  $^1\text{H}$  NMR of 3.

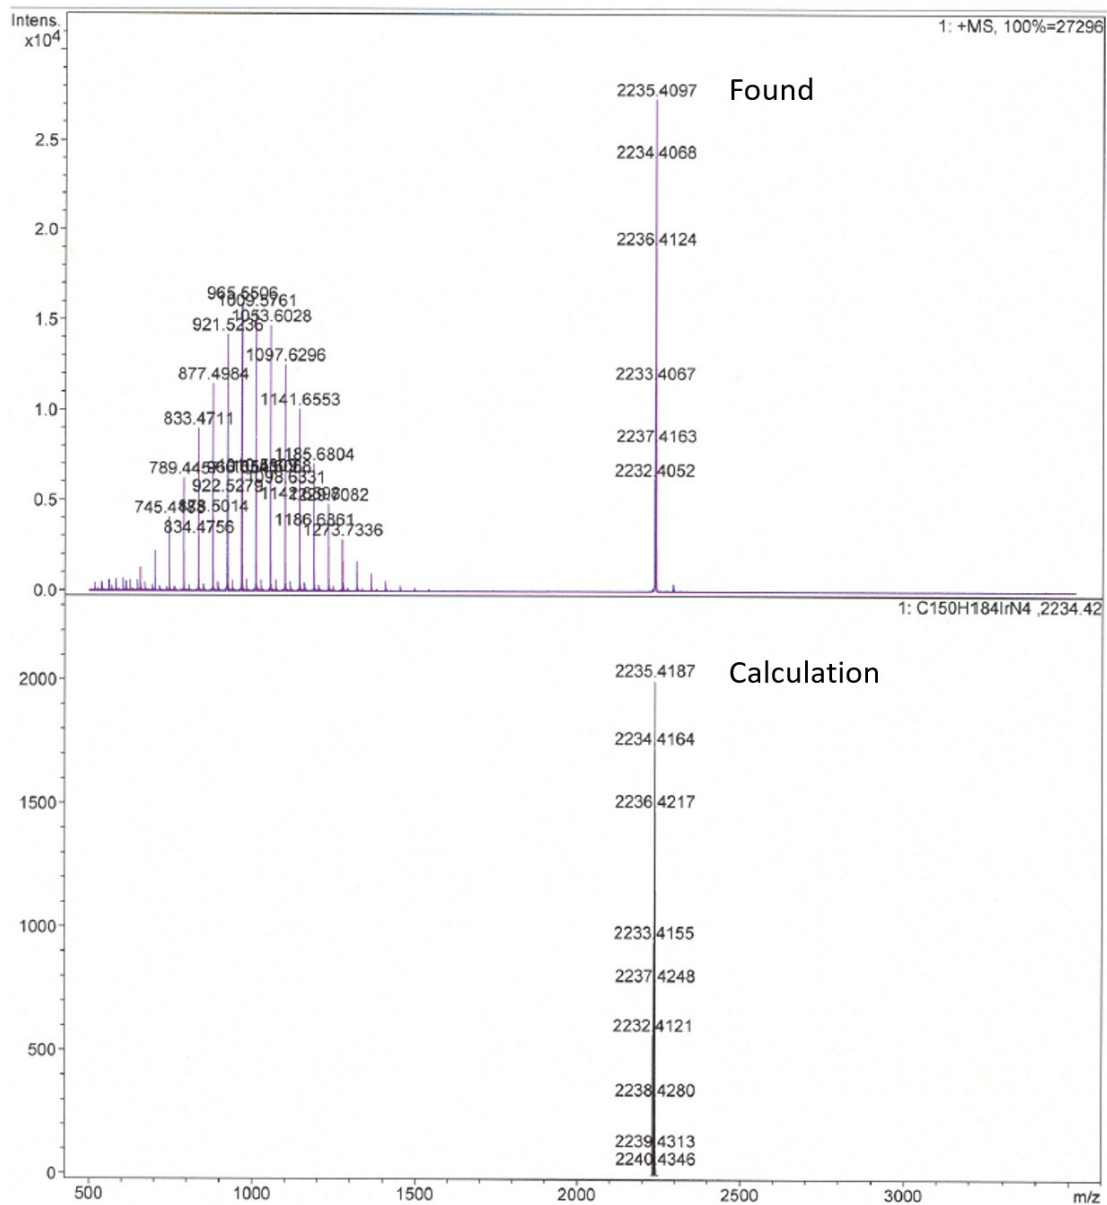

**Fig. S4.** HR-MS of 1.



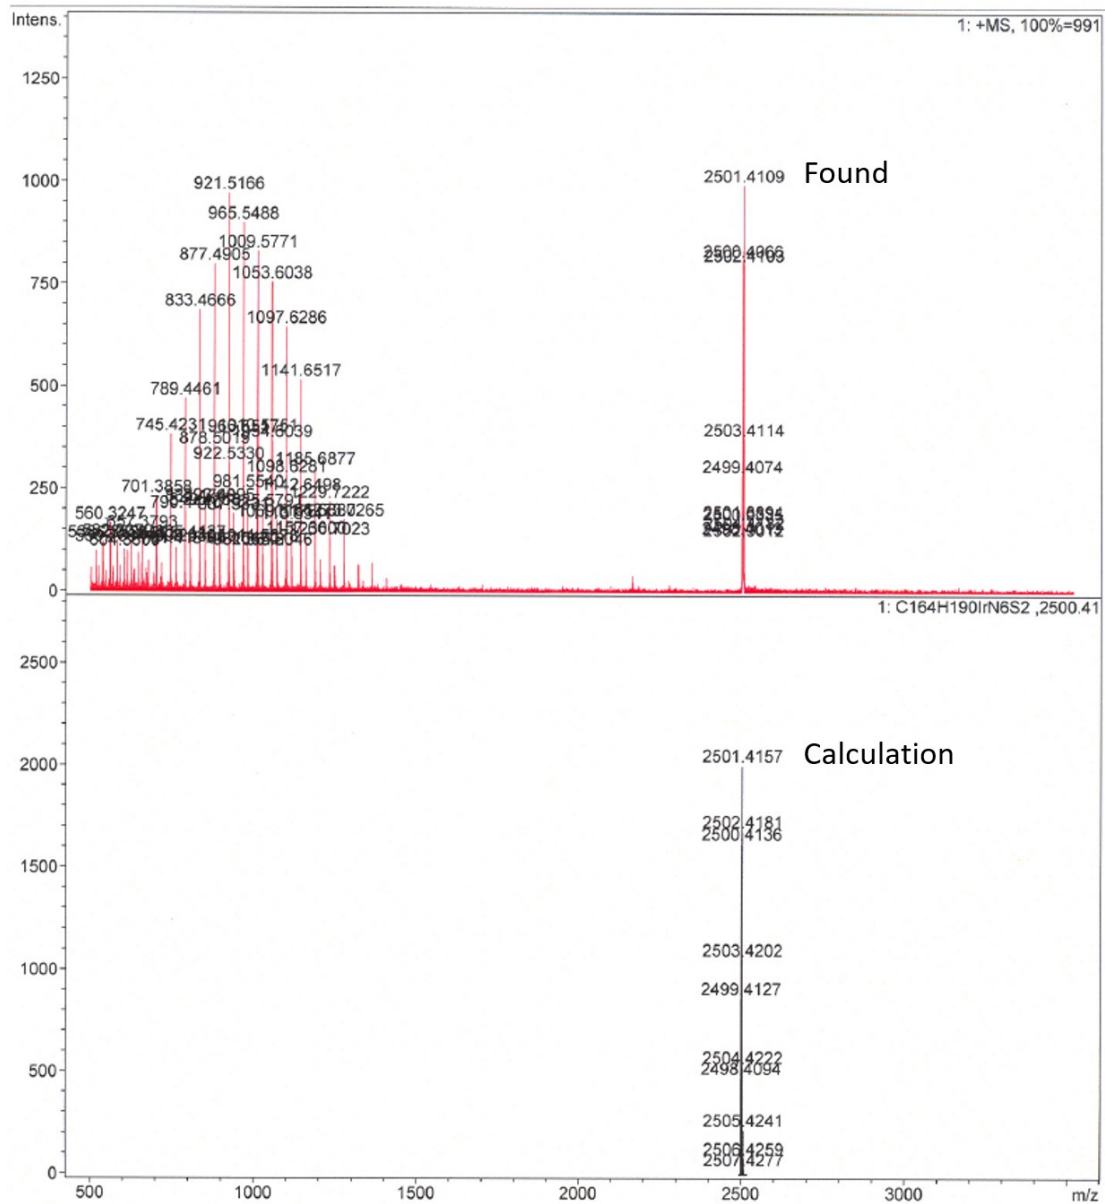

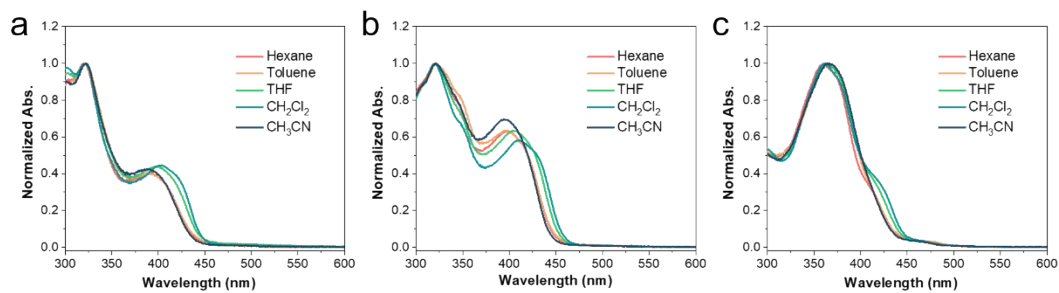

**Fig. S7.** Normalized absorption spectra of (a) **1**, (b) **2**, and (c) **3** in various solvents.

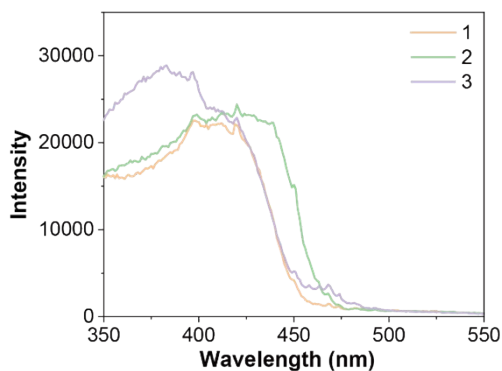

**Fig. S8.** Excitation spectra of complexes **1** – **3** in degassed  $\text{CH}_2\text{Cl}_2$  (10  $\mu\text{M}$ , maxima emission peak 603 nm for **1**, 612 nm for **2**, and 584 nm for **3**).



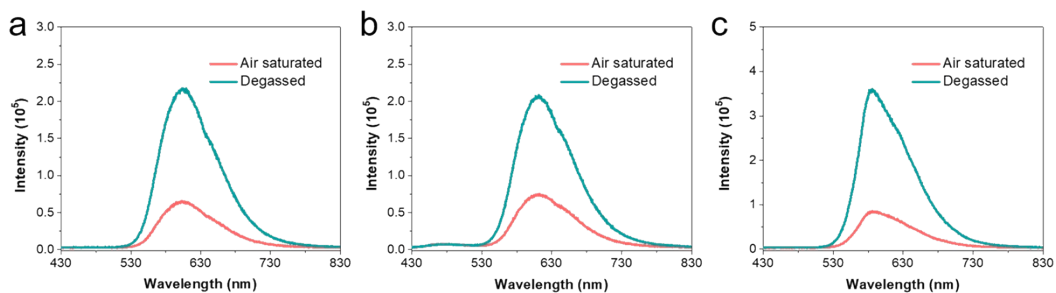

**Fig. S9.** Emission spectra of (a) **1**, (b) **2**, and (c) **3** in the air saturated or degassed  $\text{CH}_2\text{Cl}_2$  solvent.

(10  $\mu\text{M}$ ,  $\lambda_{\text{ex}} = 420 \text{ nm}$ )

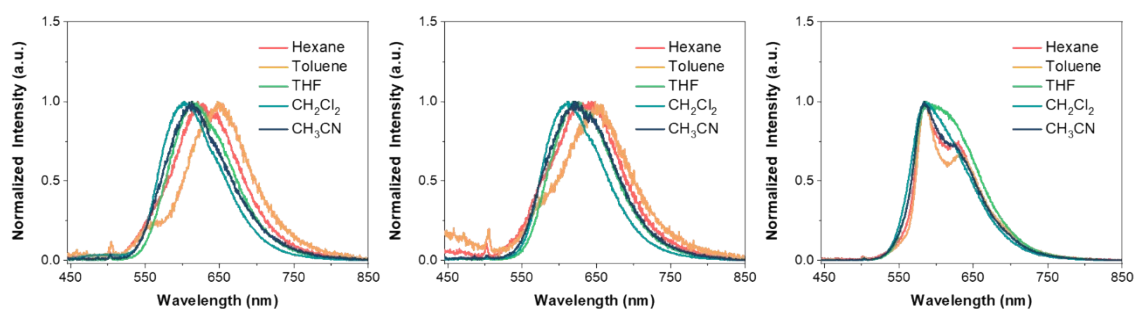

**Fig. S10.** Normalized emission spectra of (a) **1**, (b) **2**, and (c) **3** in various solvents. ( $\lambda_{\text{ex}} = 436 \text{ nm}$ )

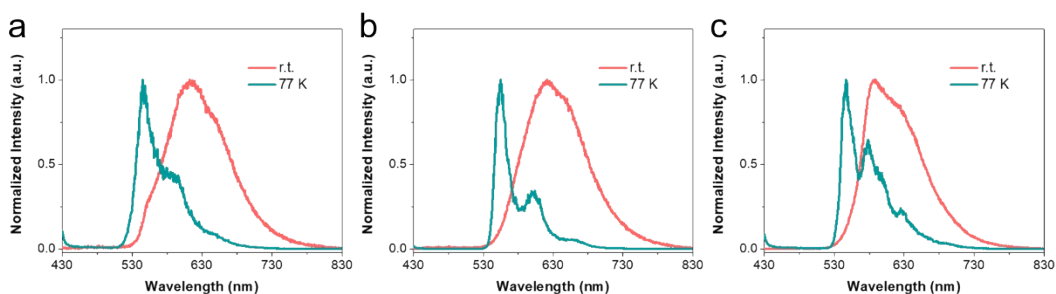

**Fig. S11.** Normalized emission spectra of (a) **1**, (b) **2**, and (c) **3** in BuCN solvent at room temperature

or 77 K. (10  $\mu\text{M}$ ,  $\lambda_{\text{ex}} = 420 \text{ nm}$ )

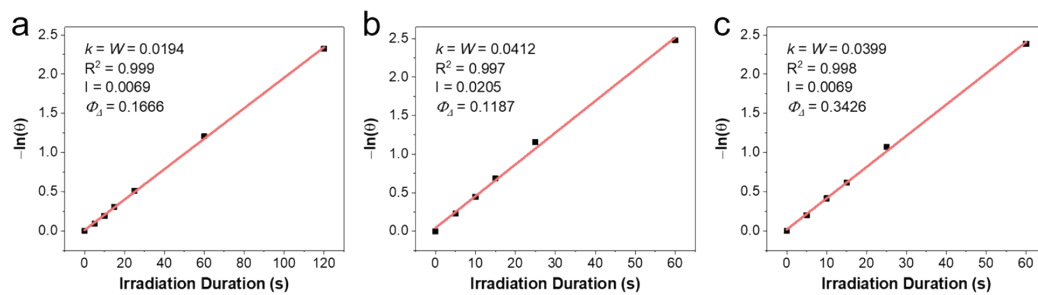

**Fig. S12.** Plotting and fitting absorbance decay of DPBF mixed with Ir(III) complex (a) **1**, (b) **2**, and (c) **3** in toluene under light irradiation (532 nm, 100 mW cm<sup>-2</sup>). *k*: fitted slope value; *I*: sample absorption rate at 532 nm.

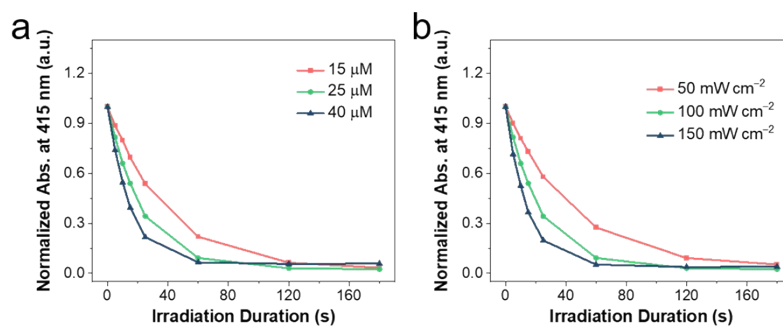

**Fig. S13.** (a) concentration- and (b) light power density-dependent <sup>1</sup>O<sub>2</sub> generation of complex **3**.

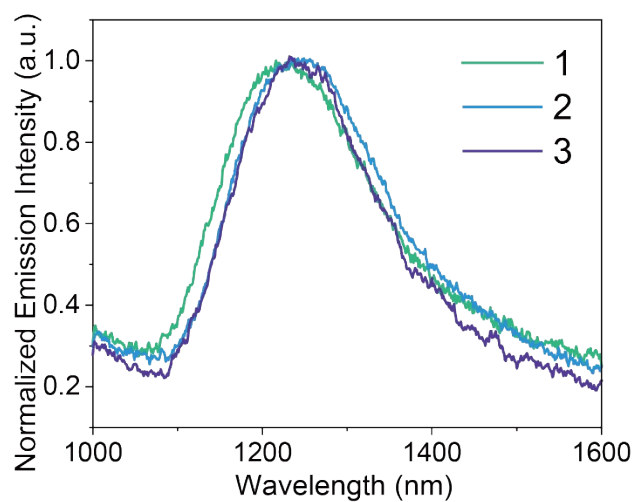

**Fig. S14.** Normalized singlet-oxygen emission spectra of complexes 1 – 3 in  $\text{CH}_2\text{Cl}_2$  ( $10 \mu\text{M}$ ,  $\lambda_{\text{ex}} = 420 \text{ nm}$ ).

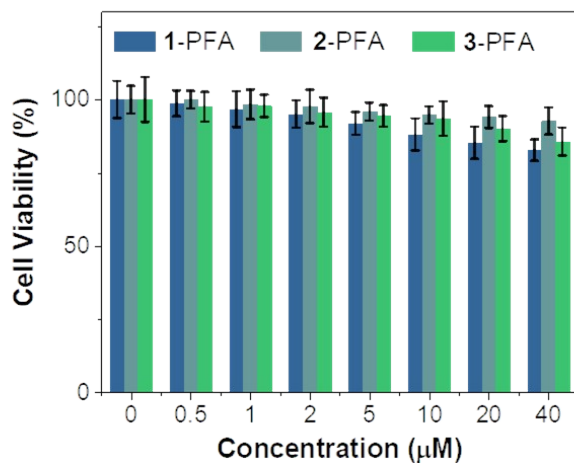

**Fig. S15.** 4T1.2 cell viability after 48 h of incubation with 1-PFA, 2-PFA and 3-PFA.

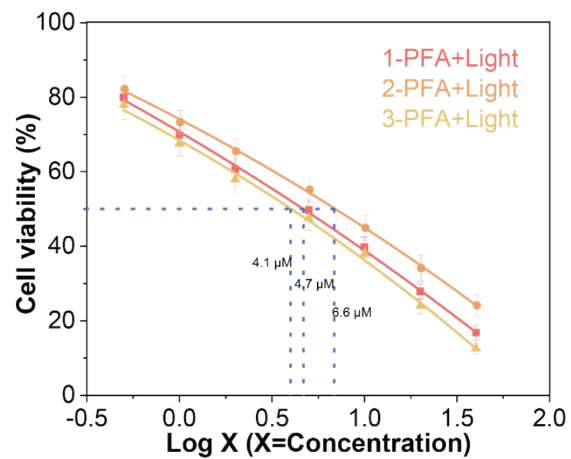

**Fig. S16.** The value of IC<sub>50</sub> with 1-PFA – 3-PFA.

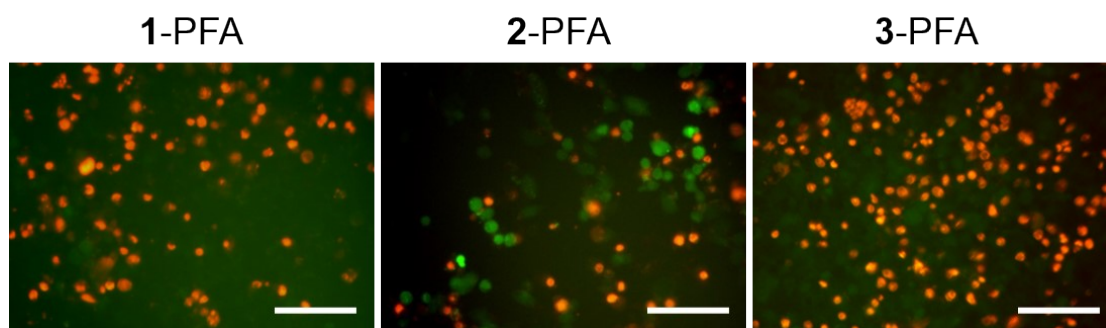

**Fig. S17.** Live and dead cells co-staining of 4T1.2 cells after PDT with 1-PFA, 2-PFA and 3-PFA.

| $\lambda_{em}/nm$ ( $\tau_{em}/\mu s$ ); $\Phi_{em}^a$ |                                 |                                 |                                 |                  |                                 |
|--------------------------------------------------------|---------------------------------|---------------------------------|---------------------------------|------------------|---------------------------------|
|                                                        | Hexane <sup>b</sup>             | toluene                         | CH <sub>2</sub> Cl <sub>2</sub> | THF              | CH <sub>3</sub> CN              |
| 1                                                      | 621 (0.32); 0.02                | 650 (0.15); 0.02                | 603 (0.82); 0.05                | 614 (0.51); 0.04 | 613 (0.22); 0.02                |
| 2                                                      | 640 (0.37); 0.01                | 654 (0.13); 0.02                | 612 (0.88); 0.05                | 622 (0.47); 0.03 | 622 (0.36); 0.02                |
| 3                                                      | 585 (3.96), 630<br>(3.62); 0.02 | 584 (4.20), 633<br>(3.43); 0.02 | 584 (1.21); 0.05                | 587 (0.74); 0.03 | 585 (0.65), 626<br>(0.57); 0.02 |

**Table S1.** Emission properties of **1** – **3** in different polarity solvents.

<sup>a</sup>Degassed [Ru(bpy)<sub>3</sub>]Cl<sub>2</sub> aqueous solution ( $\lambda_{ex} = 436$  nm,  $\Phi_{em} = 0.57$ ) was used for reference substance. <sup>b</sup>With 5% CH<sub>2</sub>Cl<sub>2</sub>.

**Table S2 Singlet-oxygen quantum yields of various photosensitizers.**

|    | Compound                           | Meatal center | $\lambda_{exc}$ (nm) | $^1O_2$ ( $\Phi_\Delta$ ) |
|----|------------------------------------|---------------|----------------------|---------------------------|
| 1  | 1 in this work                     | Ir (III)      | 532                  | 0.17                      |
| 2  | 2 in this work                     | Ir (III)      | 532                  | 0.12                      |
| 3  | 3 in this work                     | Ir (III)      | 532                  | 0.34                      |
| 4  | C14-IP2000 <sup>1</sup>            | Ir (III)      | 532                  | 0.23                      |
| 5  | Ir <sup>2</sup>                    | Ir (III)      | 532                  | 0.27                      |
| 6  | BODIPY-Ir <sup>3</sup>             | Ir (III)      | 500                  | 0.35                      |
| 7  | Ir-OH <sup>4</sup>                 | Ir (III)      | 405                  | 0.31                      |
| 8  | Ir-B(OH) <sub>2</sub> <sup>4</sup> | Ir (III)      | 405                  | 0.32                      |
| 9  | Ir <sup>5</sup>                    | Ir (III)      | 405                  | 0.46                      |
| 10 | Complex 1 <sup>6</sup>             | Ir (III)      | 405                  | 0.42                      |
| 11 | Complex 2 <sup>6</sup>             | Ir (III)      | 405                  | 0.40                      |

## Reference

1. Y. Deng, X. Wang, Y. Liu, Y. Xu, J. Zhang, F. Huang, B. Li, Y. Miao, Y. Sun and Y. Li, *Acta. Biomater.*, 2021, **119**, 323–336.
2. Y. Xu, X. Wang, K. Song, J. Du, J. Liu, Y. Miao and Y. Li, *RSC Adv.*, 2021, **11**, 15323–15331.
3. L. Qiao, J. Liu, S. Kuang, X. Liao, J. Kou, L. Ji and H. Chao, *Dalton. Trans.*, 2021, **50**, 14332–14341.
4. X. Liao, J. Shen, W. Wu, S. Kuang, M. Lin, J. Karges, Z. Tang and H. Chao, *Inorg. Chem. Front.*, 2021, **8**, 5045–5053.
5. C. Zhang, R. Guan, X. Liao, C. Ouyang, T. W. Rees, J. Liu, Y. Chen, L. Ji and H. Chao, *Chem. Commun.*, 2019, **55**, 12547–12550.
6. L. K. McKenzie, I. V. Sazanovich, E. Baggaley, M. Bonneau, V. Guerchais, J. A. Williams, J. A. Weinstein and H. E. Bryant, *Chem. Eur. J.*, 2017, **23**, 234–238.
